# Supplementary material for: Hollow manganese phosphonate microspheres with hierarchical porosity for efficient adsorption and separation
Source: Royal Society of Chemistry journal article supplement (doi:10.1039/c4nr00629a), 2014-01-01
Supplement: c4nr00629a1.pdf [file c4nr00629a1.pdf]

## Supporting Information:

# **Hollow Manganese Phosphonate Microspheres with Hierarchical Porosity for Efficient Adsorption and Separation**

Yun-Pei Zhu,<sup>a</sup> Ya-Lu Liu,<sup>a</sup> Tie-Zhen Ren,<sup>b</sup> and Zhong-Yong Yuan <sup>a,\*</sup>

<sup>a</sup> *Key Laboratory of Advanced Energy Materials Chemistry (Ministry of Education), Collaborative Innovation Center of Chemical Science and Engineering (Tianjin), College of Chemistry, Nankai University, Tianjin 300071, China. E-mail: zyyuan@nankai.edu.cn*

<sup>b</sup> *School of Chemical Engineering and Technology, Hebei University of Technology, Tianjin 300130, China.*

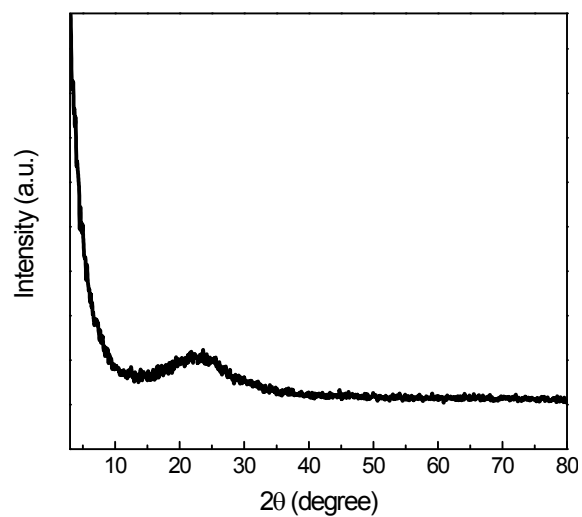

**Fig. S1** XRD pattern of the manganese phosphonate hybrid.

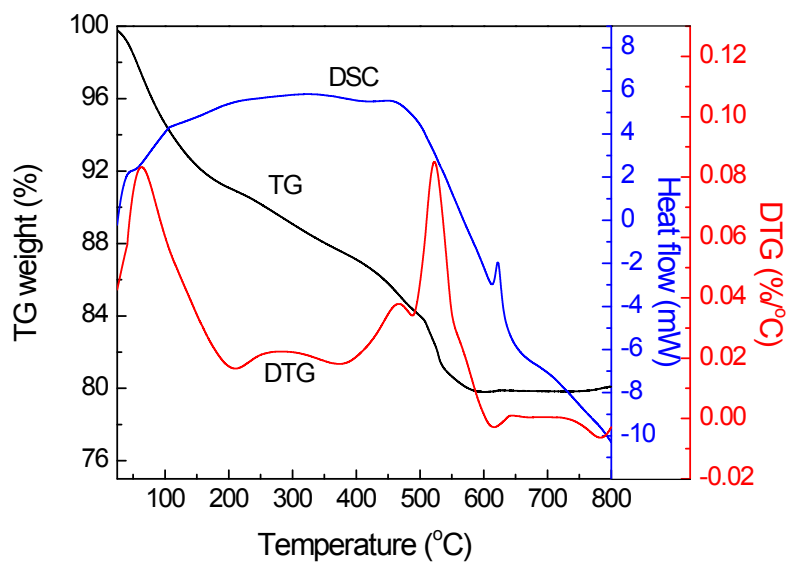

**Fig. S2** TG-DSC curves of the manganese phosphonate hybrid.

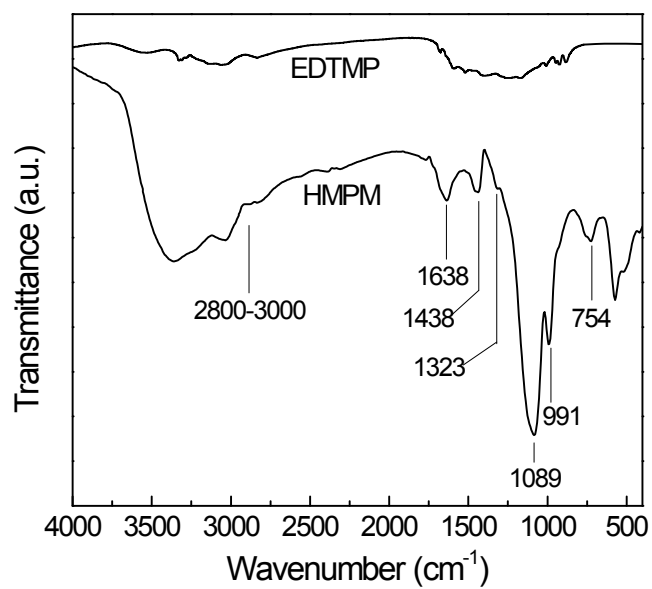

**Fig. S3** FT-IR spectrum of the manganese phosphonate material.

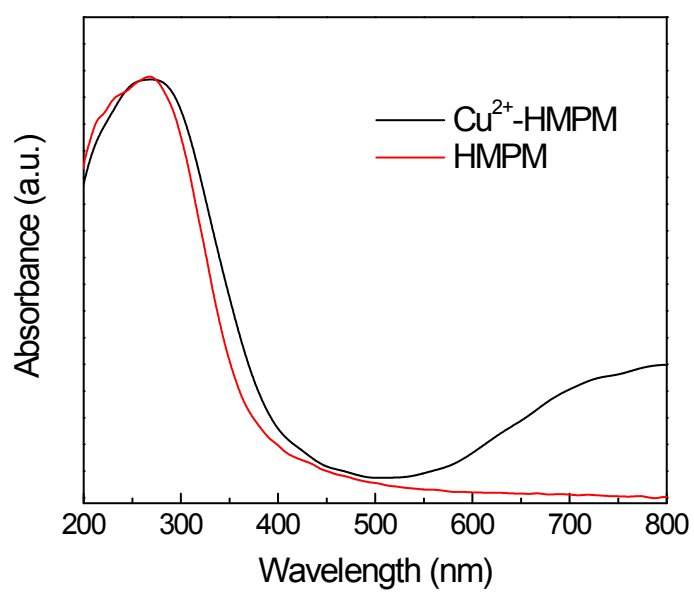

**Fig. S4** UV-vis diffuse-reflectance spectra of HMPM before and after Cu<sup>2+</sup> ion dispersing.

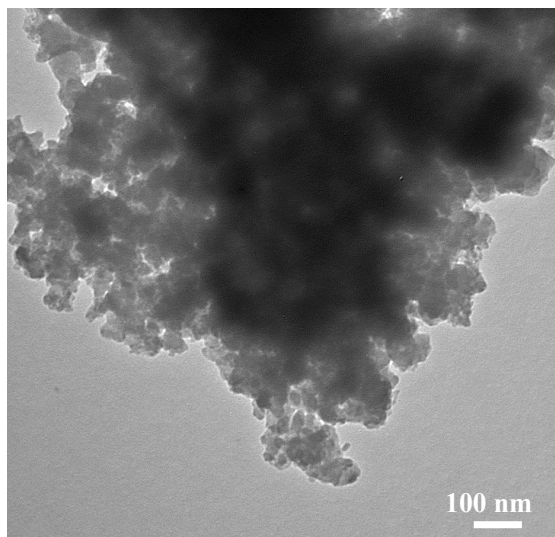

**Fig. S5** TEM image of the HMPM material after ball-milling treatment.

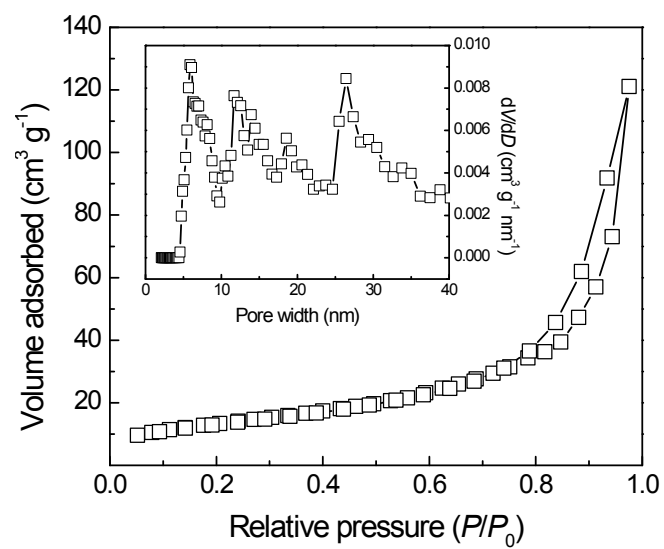

**Fig. S6**  $\text{N}_2$  adsorption-desorption isotherm of HMPM after ball-milling treatment, and the corresponding pore size distribution curve (*inset*).
